# Supplementary material for: Detailed molecular movements during poly(l-lactic acid) cold-crystallization investigated by FTIR spectroscopy combined with two-dimensional correlation analysis
Source: Royal Society of Chemistry journal article supplement (doi:10.1039/c7ra08921j), 2017-01-01
Supplement: c7ra08921j1.pdf [file c7ra08921j1.pdf]

Electronic Supporting Information for

Detailed molecular movements during poly(L-lactic acid) cold-crystallization investigated by FTIR spectroscopy combined with two-dimensional correlation analysis

Bai Xue<sup>1</sup>, Lan Xie<sup>1\*</sup>, Junhua Zhang<sup>2\*</sup>

1. Department of Polymer Materials and Engineering, College of Materials and Metallurgy, Guizhou University, Guiyang 550025, China

2. The State Key Laboratory of Polymer Materials Engineering, Polymer Research Institute of Sichuan University, Chengdu 610065, China

\* Corresponding author. Lan Xie, E-mail: [mm.lanxie@gzu.edu.cn](mailto:mm.lanxie@gzu.edu.cn); Junhua Zhang, E-mail: [zhangjh@scu.edu.cn](mailto:zhangjh@scu.edu.cn). Fax number: 86-28-85402465

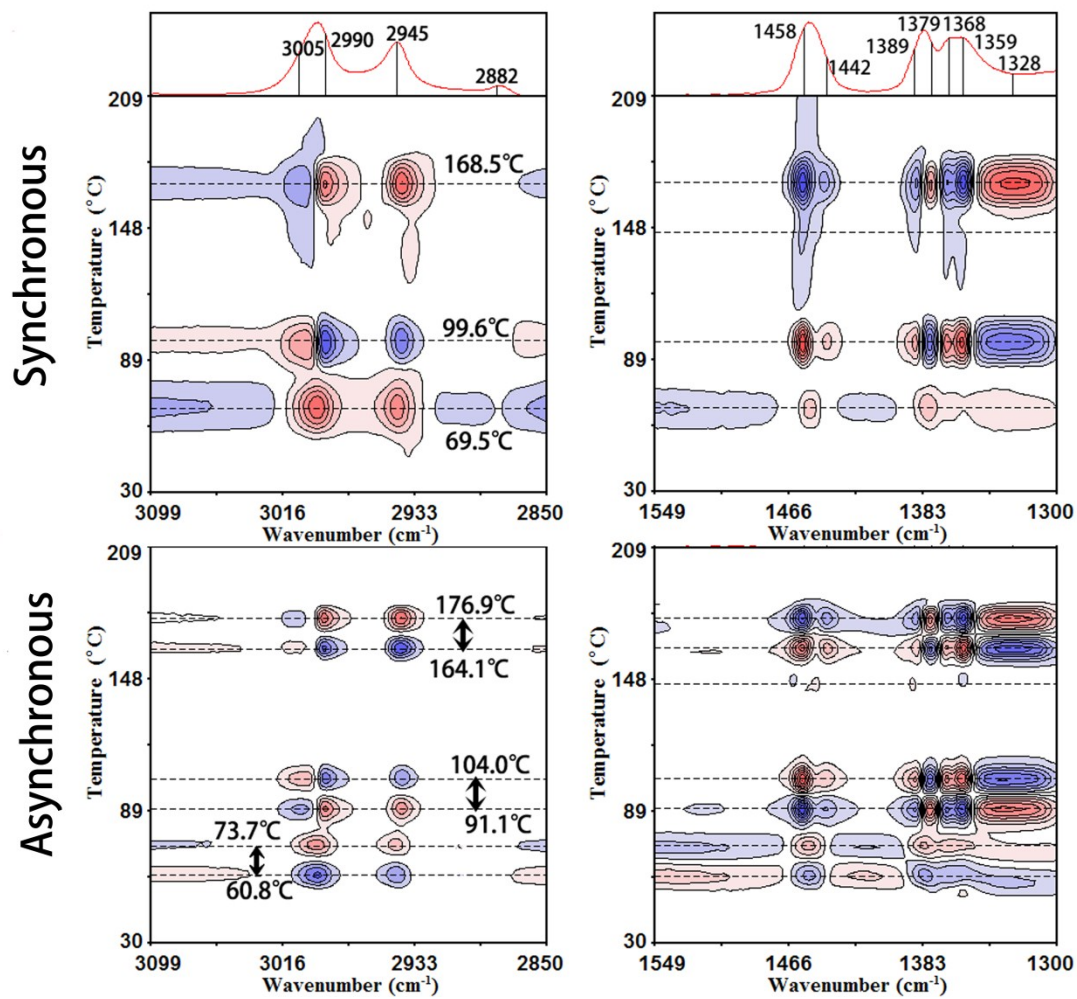

Figure S1: PCMW2D correlation FTIR spectra of PLLA in the regions of 3099-2850 cm<sup>-1</sup> and 1549-1300 cm<sup>-1</sup> calculated from the temperature-dependent spectroscopy.

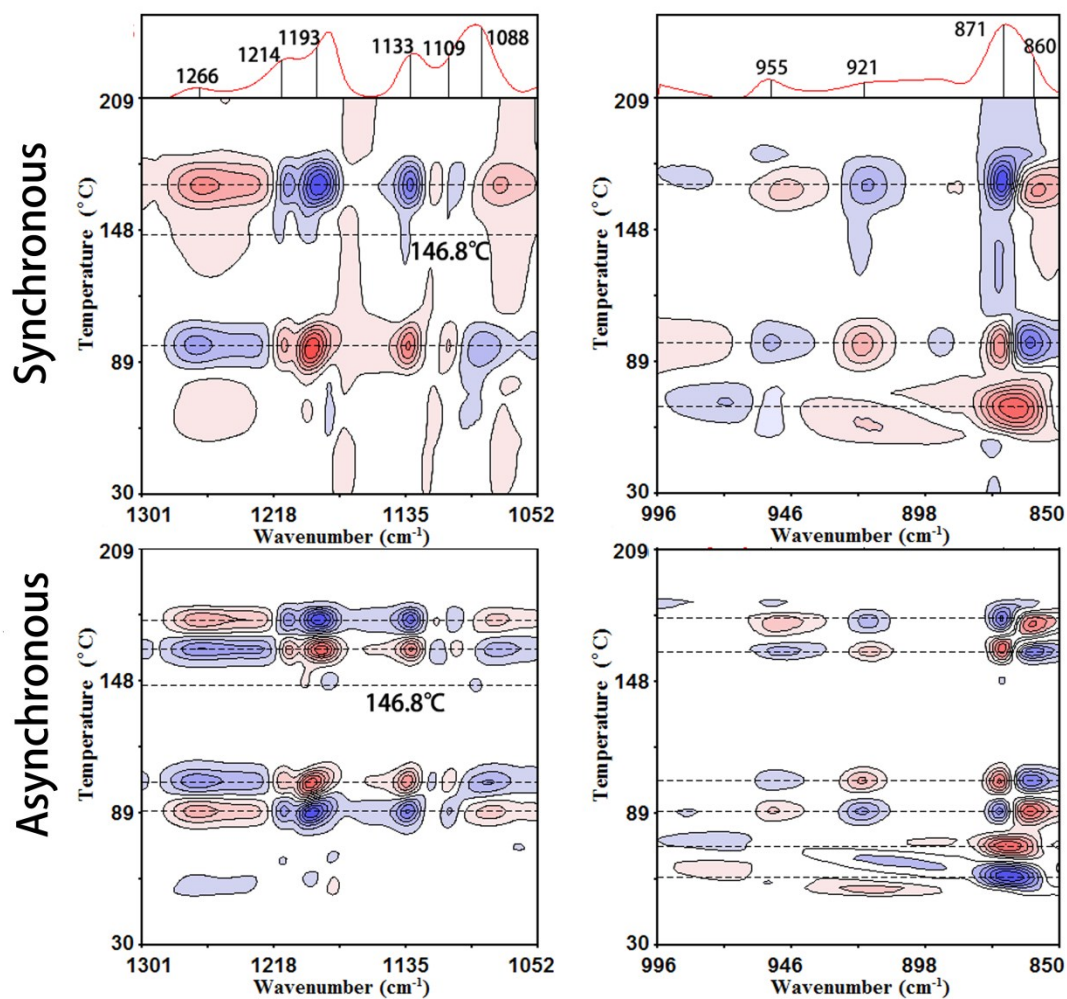

Figure S2: PCMW2D correlation FTIR spectra of PLLA in the regions of 1301-1052  $\text{cm}^{-1}$  and 996-850  $\text{cm}^{-1}$  calculated from the temperature-dependent spectroscopy.

To investigate the crystalline degree depending on the increasing temperature, the crystalline degree could be calculated from the following equation using the DSC data.

$$X_c = \frac{\Delta H_m}{\Delta H_m^*} \quad (\text{S1})$$

where  $X_c$  is the crystalline degree of PLLA,  $\Delta H_m$  is the enthalpy for melting of PLLA and  $\Delta H_m^*$  denotes the theoretical melting enthalpy for 100% crystalline PLLA (93.7 J/g)<sup>S1, S2</sup>. To determine the original crystalline degree of the PLLA sample, the extra heat absorbed by cold-crystallization process has to be subtracted from the total melting enthalpy. Therefore, the

modified equation is exhibited as follows:

$$X_c = \frac{\Delta H_m - \Delta H_{cc}}{\Delta H_m^*} \quad (S2)$$

where  $\Delta H_{cc}$  stands for the enthalpy of PLLA cold-crystallization. And the original crystalline degree of PLLA sample ( $X_c$ ) with the value of 26.8% is calculated.

As shown in DSC curve (Fig. 4), the cold-crystallization of PLLA is observed in the temperature region of 83.5-111.3 °C. Before the cold-crystallization process, the crystalline degree of the sample almost remains the same, although the relaxation process takes place in this temperature range <sup>S1, S3, S4</sup>. Thus, the crystalline degree of the sample maintains 26.8% at the temperature lower than 83.5 °C.

The heating rate of DSC is 5 °C/min, so the equation can be written as follows:

$$T = 20^\circ\text{C} + \frac{5}{60}t \quad (S3)$$

When the temperature higher than 83.5 °C<sup>S1, S5-S7</sup>,

$$X_c(T) = 26.8\% + \frac{- \int_{83.5}^T \frac{dH(T)}{dT} dT}{\Delta H_m^*} \quad (S4)$$

where  $X_c(T)$  is the crystalline degree of PLLA at the temperature T.

The crystalline degree of PLLA as a function of temperature calculated from DSC data is shown in Figure S3.

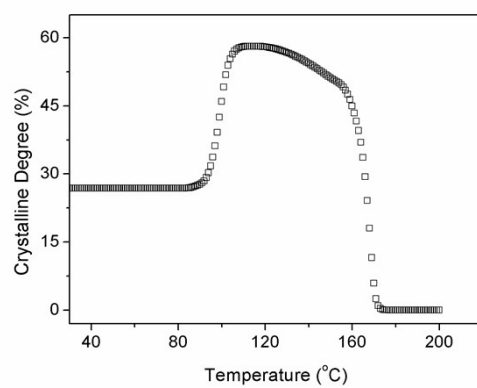

Figure S3: The crystalline degree of PLLA as a function of temperature calculated from DSC

curve.

# Synchronous

# Asynchronous

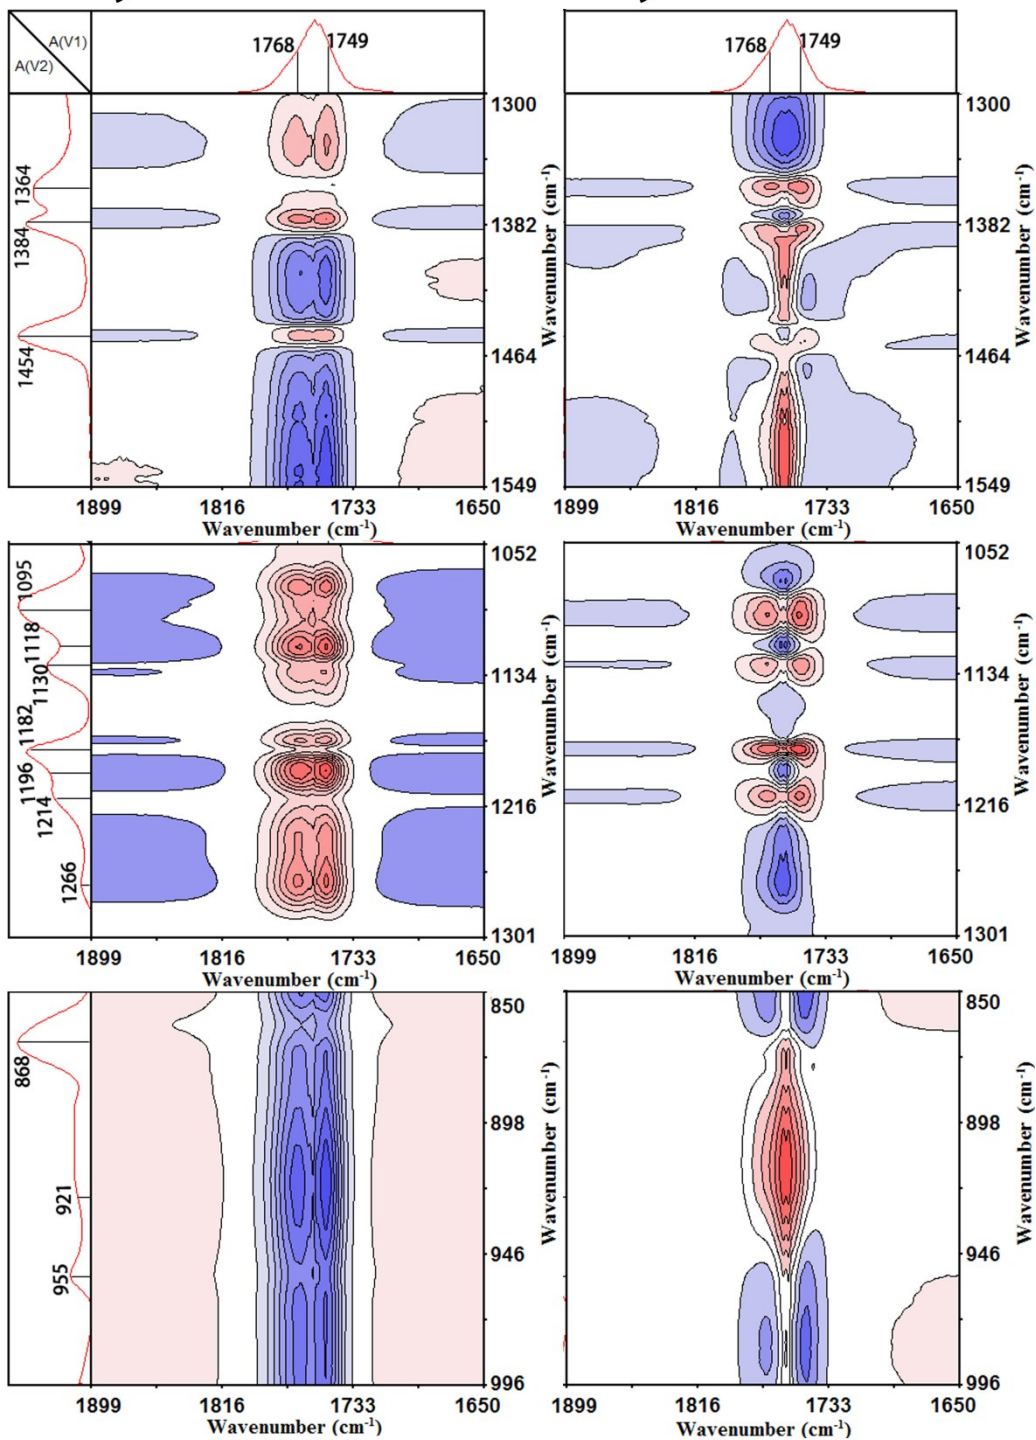

Figure S4: Synchronous (left) and asynchronous (right) 2D correlation FTIR spectra calculated from the temperature-dependent spectra of Process I (60.8-73.7 °C) in the regions 1899-1650  $\text{cm}^{-1}$  vs. 1549-1300  $\text{cm}^{-1}$ , 1899-1650  $\text{cm}^{-1}$  vs. 1301-1052  $\text{cm}^{-1}$ , and 1899-1650  $\text{cm}^{-1}$  vs. 996-850  $\text{cm}^{-1}$ .

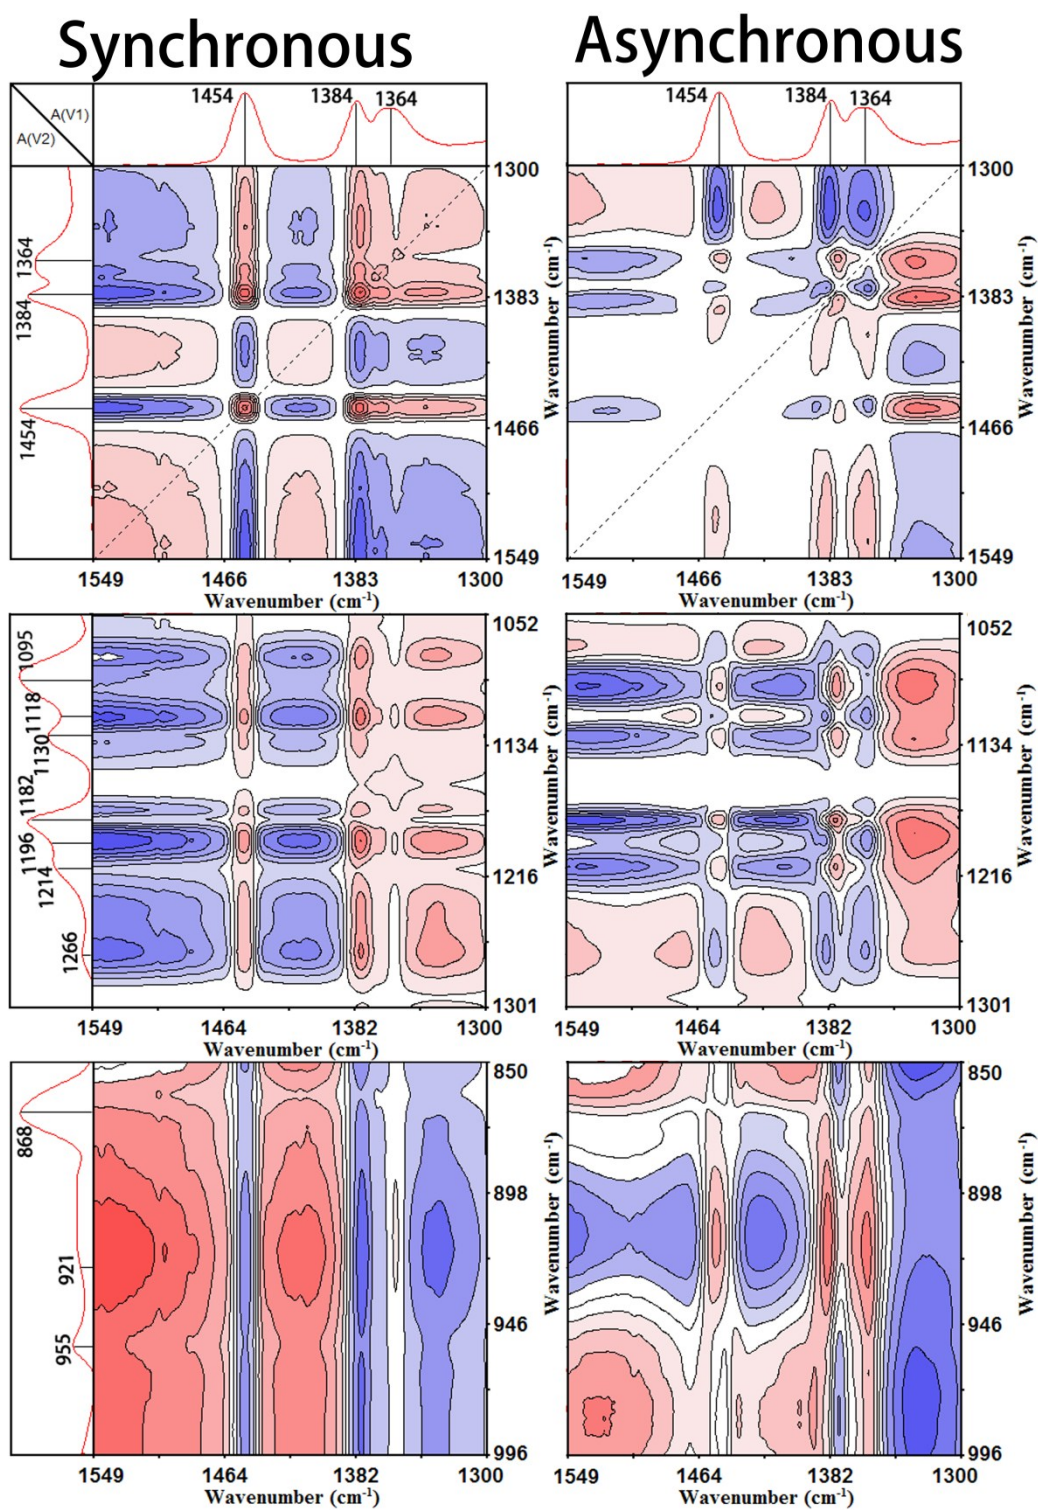

Figure S5: Synchronous (left) and asynchronous (right) 2D correlation FTIR spectra calculated from the temperature-dependent spectra of Process I (60.8-73.7 °C) in the regions 1549-1300  $\text{cm}^{-1}$  vs. 1549-1300  $\text{cm}^{-1}$ , 1549-1300  $\text{cm}^{-1}$  vs. 1301-1052  $\text{cm}^{-1}$ , and 1549-1300  $\text{cm}^{-1}$  vs. 996-850  $\text{cm}^{-1}$ .

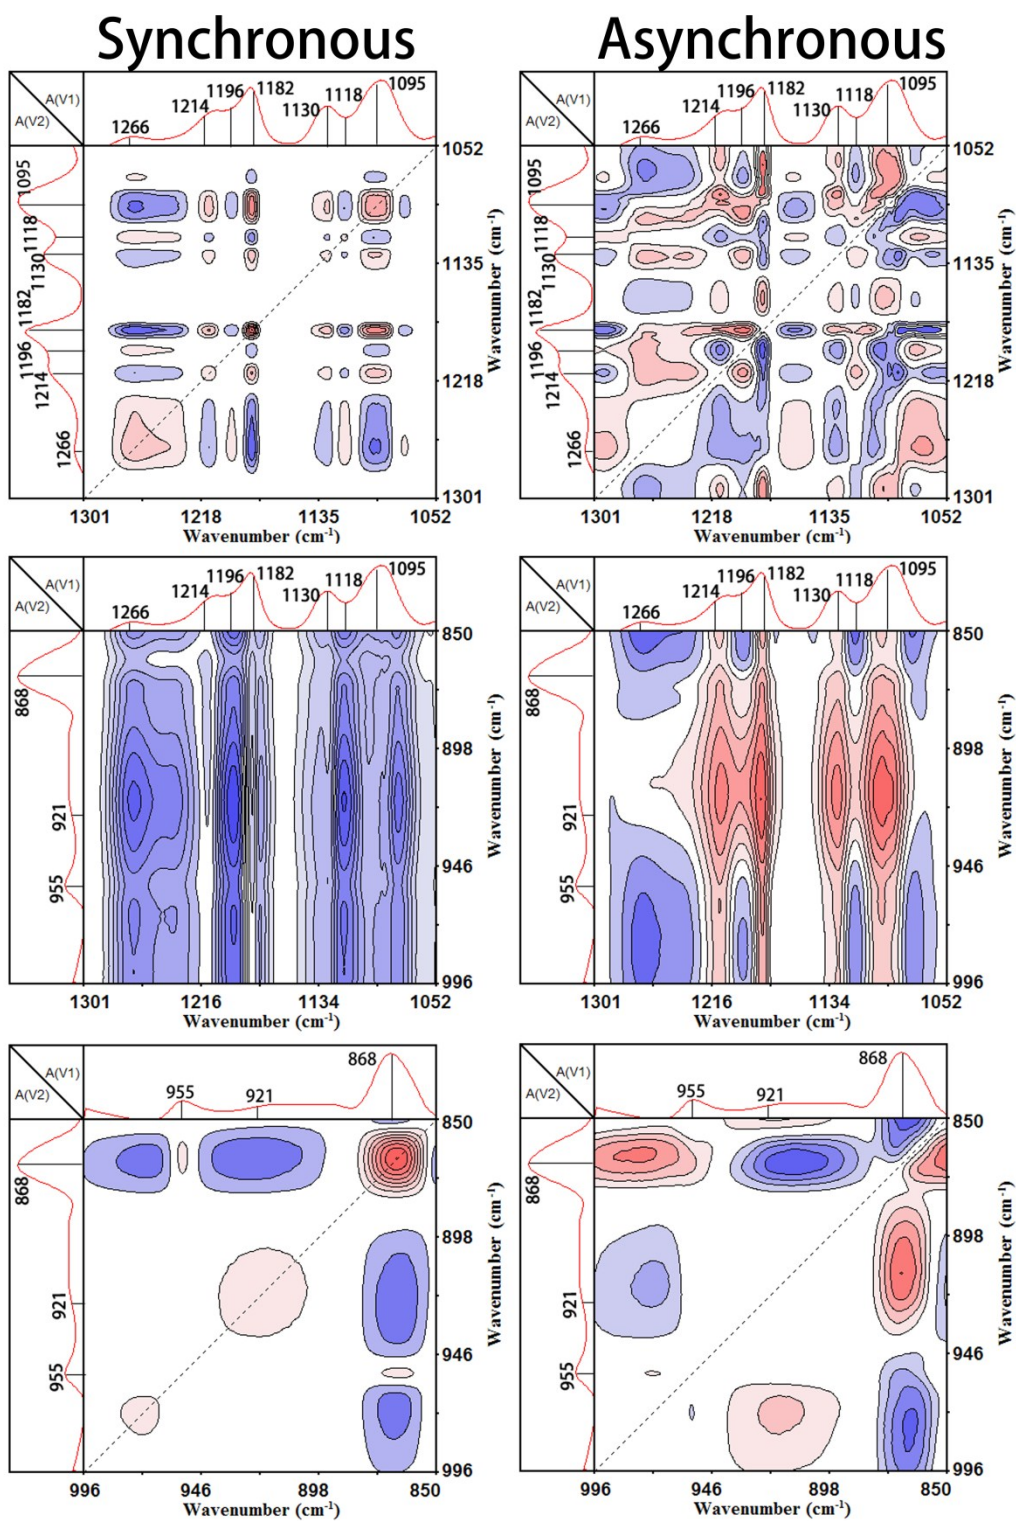

Figure S6: Synchronous (left) and asynchronous (right) 2D correlation FTIR spectra calculated from the temperature-dependent spectra of Process I (60.8-73.7 °C) in the regions 1301-1052  $\text{cm}^{-1}$  vs. 1301-1052  $\text{cm}^{-1}$ , 1301-1052  $\text{cm}^{-1}$  vs. 996-850  $\text{cm}^{-1}$ , and 996-850  $\text{cm}^{-1}$  vs. 996-850  $\text{cm}^{-1}$ .



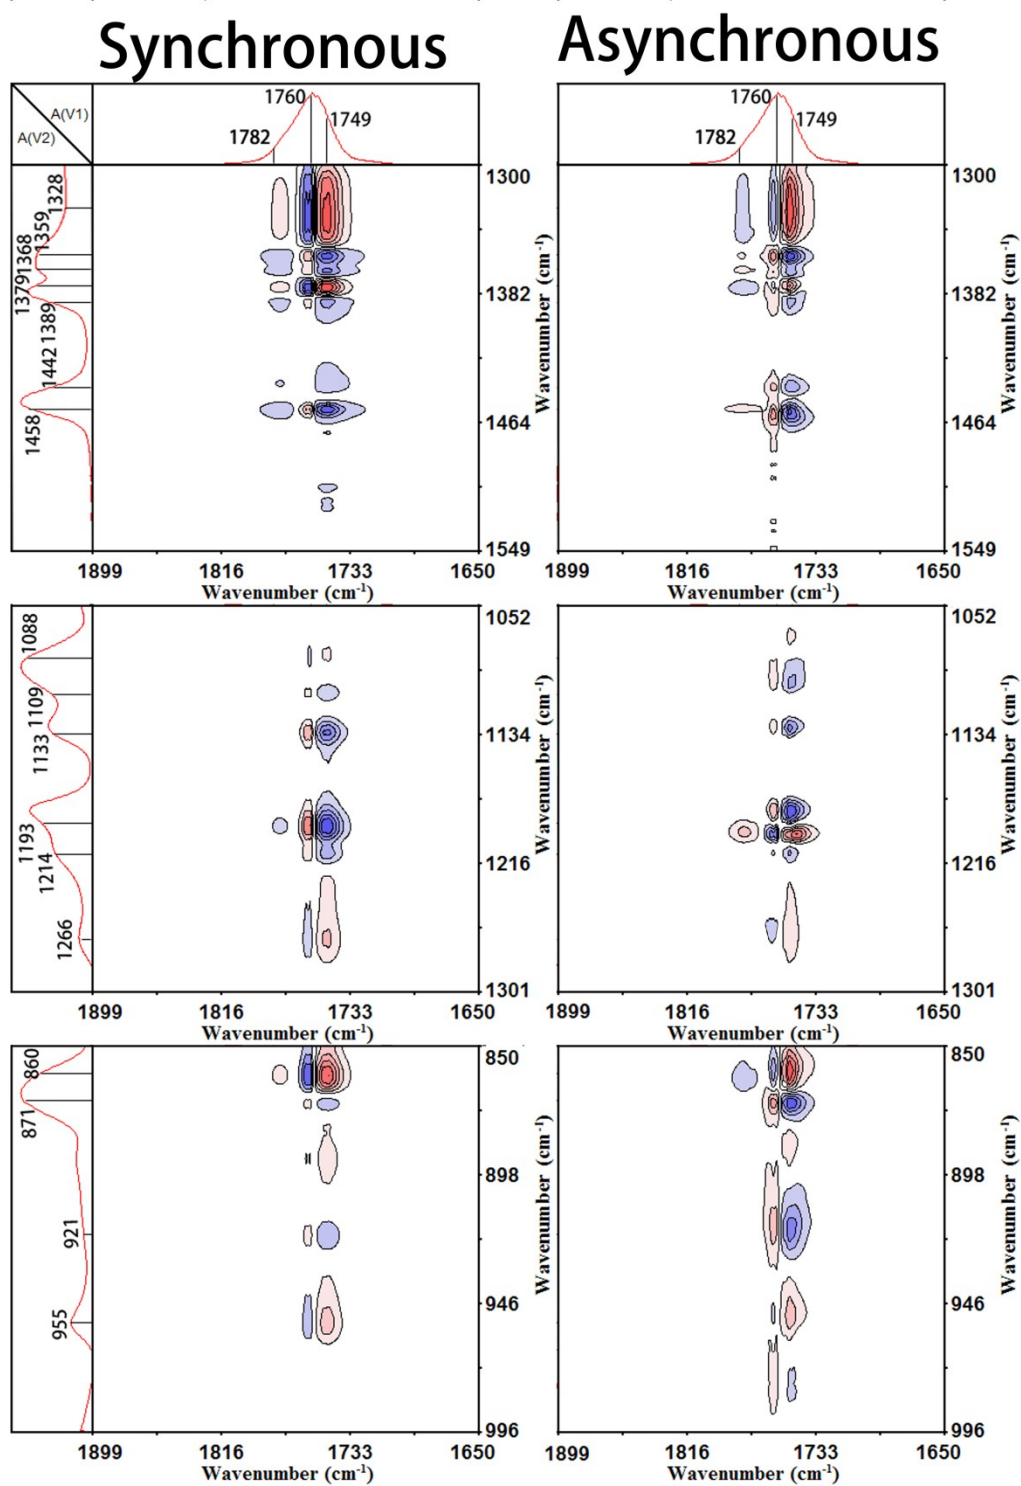

Figure S7: Synchronous (left) and asynchronous (right) 2D correlation FTIR spectra calculated from the temperature-dependent spectra of Process I (91.1-104.0 °C) in the regions 1899-1650  $\text{cm}^{-1}$  vs. 1549-1300  $\text{cm}^{-1}$ , 1899-1650  $\text{cm}^{-1}$  vs. 1301-1052  $\text{cm}^{-1}$ , and 1899-1650  $\text{cm}^{-1}$  vs. 996-850  $\text{cm}^{-1}$ .

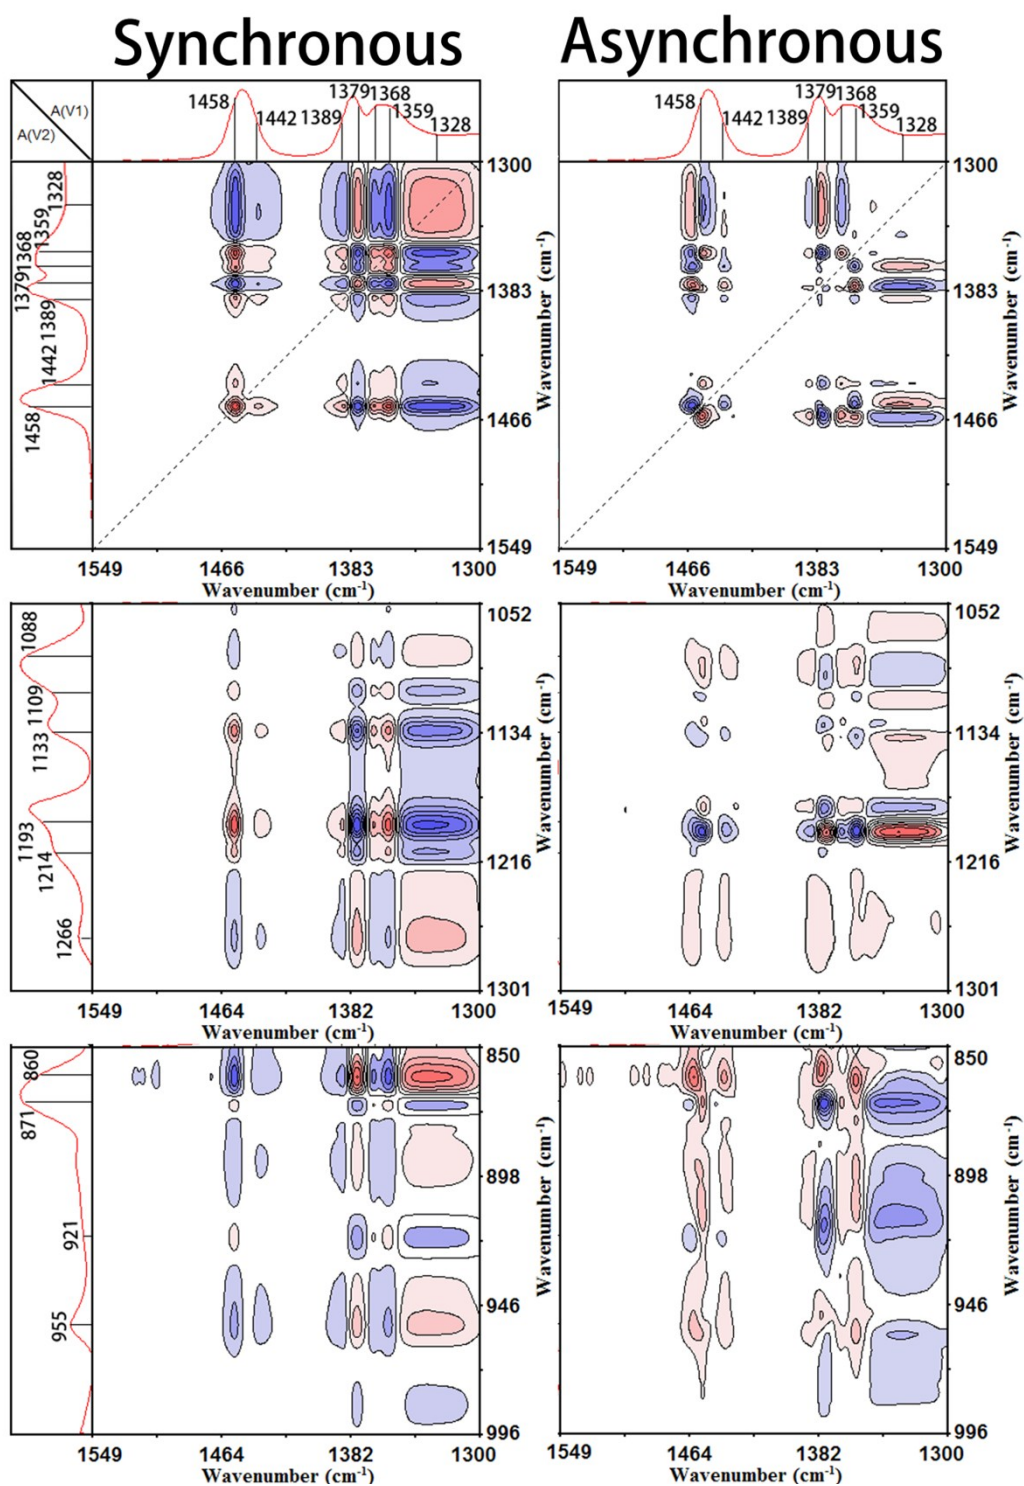

Figure S8: Synchronous (left) and asynchronous (right) 2D correlation FTIR spectra calculated from the temperature-dependent spectra of Process II (91.1-104.0 °C) in the regions 1549-1300  $\text{cm}^{-1}$  vs. 1549-1300  $\text{cm}^{-1}$ , 1549-1300  $\text{cm}^{-1}$  vs. 1301-1052  $\text{cm}^{-1}$ , and 1549-1300  $\text{cm}^{-1}$  vs. 996-850  $\text{cm}^{-1}$ .

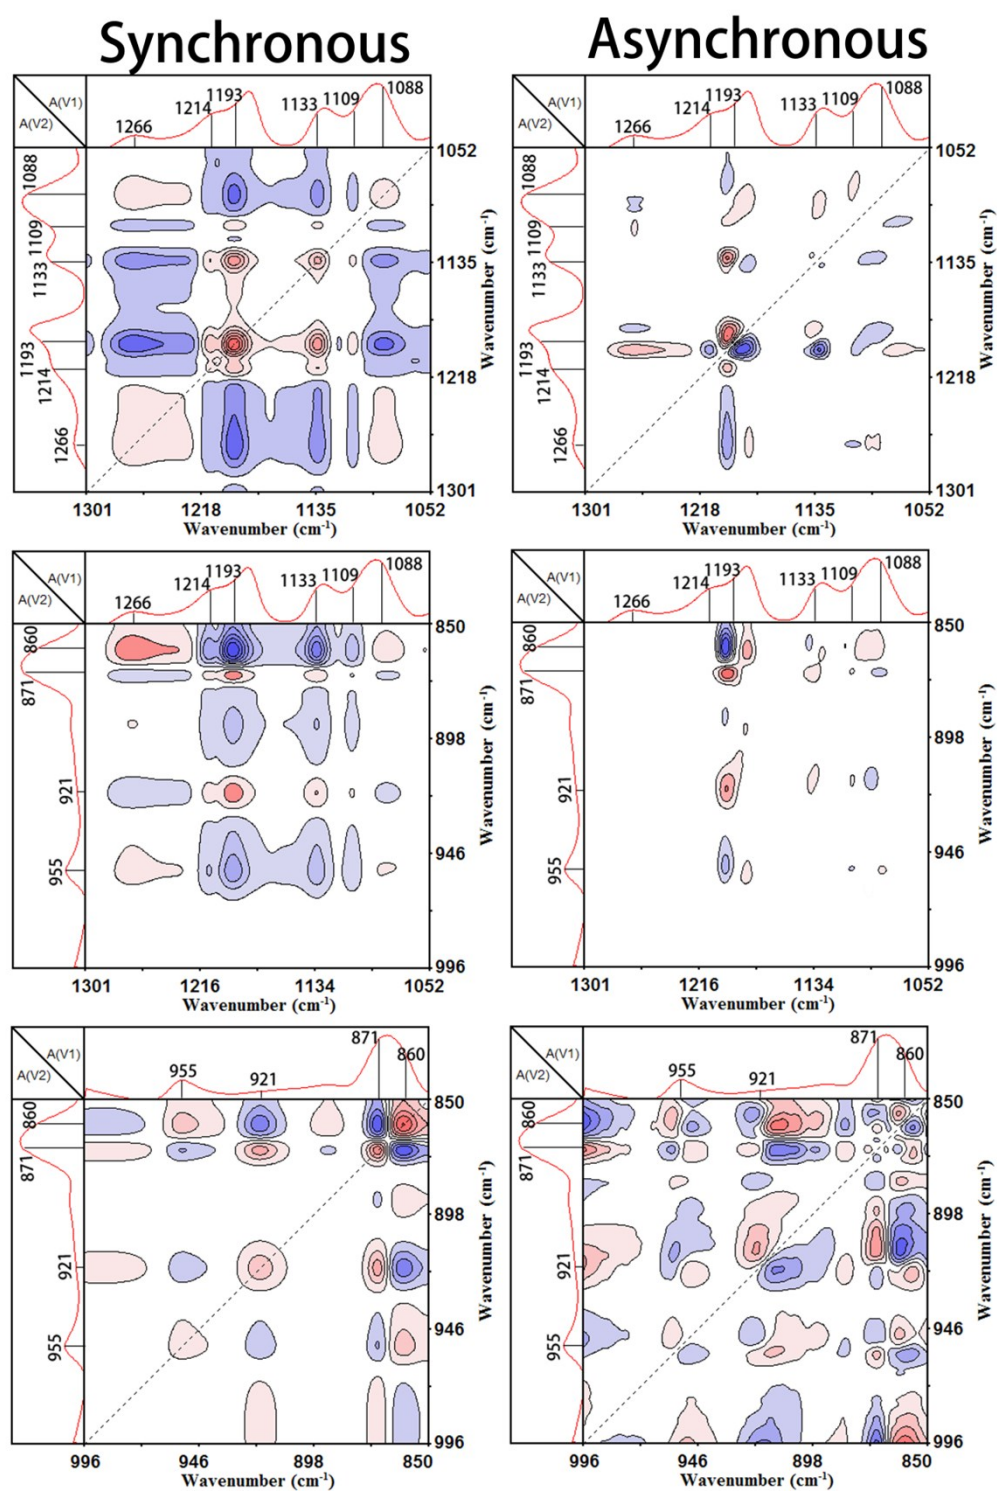

Figure S9: Synchronous (left) and asynchronous (right) 2D correlation FTIR spectra calculated from the temperature-dependent spectra of Process II (91.1-104.0 °C) in the regions 1301-1052 cm<sup>-1</sup> vs. 1301-1052 cm<sup>-1</sup>, 1301-1052 cm<sup>-1</sup> vs. 996-850 cm<sup>-1</sup>, and 996-850 cm<sup>-1</sup> vs. 996-850 cm<sup>-1</sup>.

## References:

- [S1] L. Qin, J. Qiu, M. Liu, S. Ding, L. Shao, S. Lv, G. Zhang, Y. Zhao and X. Fu, Chem. Eng. J., 2011, **166**, 772-778.
- [S2] B. Xue, D. Guo and J. Bao, J. Polym. Eng., 2016, **36**, 381-390.
- [S3] I. M. Hodge, Macromolecules, 1983, **16**, 898-902.
- [S4] A. R. Berens and I. M. Hodge, Macromolecules, 1982, **15**, 756-761.
- [S5] P. Song, G. Chen, Z. Wei, Y. Chang, W. Zhang and J. Ling, Polymer, 2012, **53**, 4300-4309.
- [S6] L. Wen and Z. Xin, Chinese J. Chem. Eng., 2010, **18**, 899-904.
- [S7] H. Xiao, D. Guo and J. Bao, J. Appl. Polym. Sci., 2015, **132**, 41454-41463.
